# Supplementary material for: Li0.3V2O5 with high lithium diffusion rate: a promising anode material for aqueous lithium-ion batteries with superior rate performance
Source: Royal Society of Chemistry journal article supplement (doi:10.1039/c3ta01548c), 2013-01-01
Supplement: c3ta01548c.pdf [file c3ta01548c.pdf]

## Supporting Information

The SEM image of the sample is shown in Fig. S1

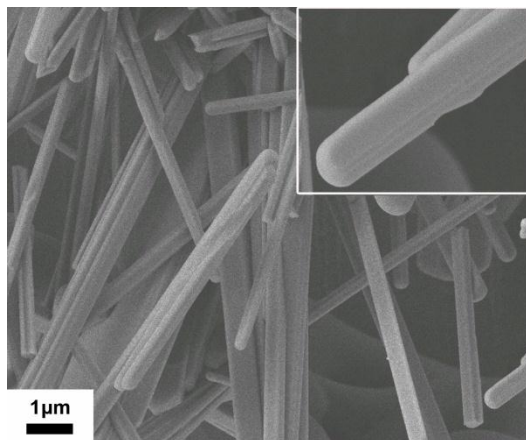

**Figure S1.** SEM image of the products

The capacity and cycle performance of  $\text{Li}_{0.3}\text{V}_2\text{O}_5/\text{LiCoO}_2$  ALIBs at 180mA/g is shown in Fig. S2.

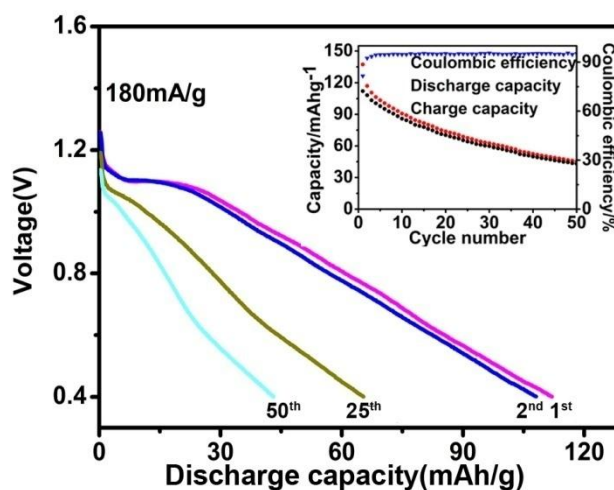

**Fig. S2** (a) Voltage versus discharge capacity curves curves of the  $\text{Li}_{0.3}\text{V}_2\text{O}_5/\text{LiCoO}_2$  ALIBs at 180 mA/g, the insert is the charge/discharge capacity and Coulombic efficiency versus cycle number.

Voltage versus charge capacity curves of the  $\text{Li}_{0.3}\text{V}_2\text{O}_5/\text{LiCoO}_2$  ALIBs at different current densities are shown in Fig. S3 (a, b, c) and the XRD patterns of the  $\text{Li}_{0.3}\text{V}_2\text{O}_5$  after 50 cycles is shown in Fig. S3 (d).

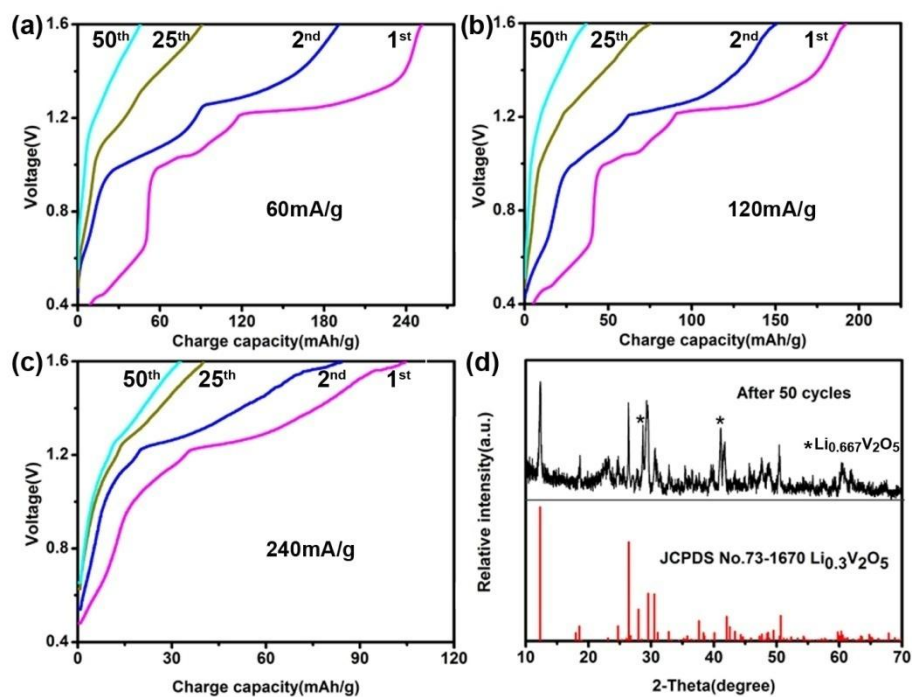

**Figure S3.** Voltage versus charge capacity curves of the  $\text{Li}_{0.3}\text{V}_2\text{O}_5/\text{LiCoO}_2$  ALIBs at (a) 60mA/g, (b)120mA/g and (c)240mA/g, (d) is the XRD patterns of the  $\text{Li}_{0.3}\text{V}_2\text{O}_5$  after 50 cycles.
